# Supplementary material for: Global transcriptional analysis of primitive thymocytes reveals accelerated dynamics of T cell specification in fetal stages
Source: PubMed Central journal article supplement (PMC3395349; doi:10.1007/s00251-012-0620-6), 2012-05-13

### ETP adult

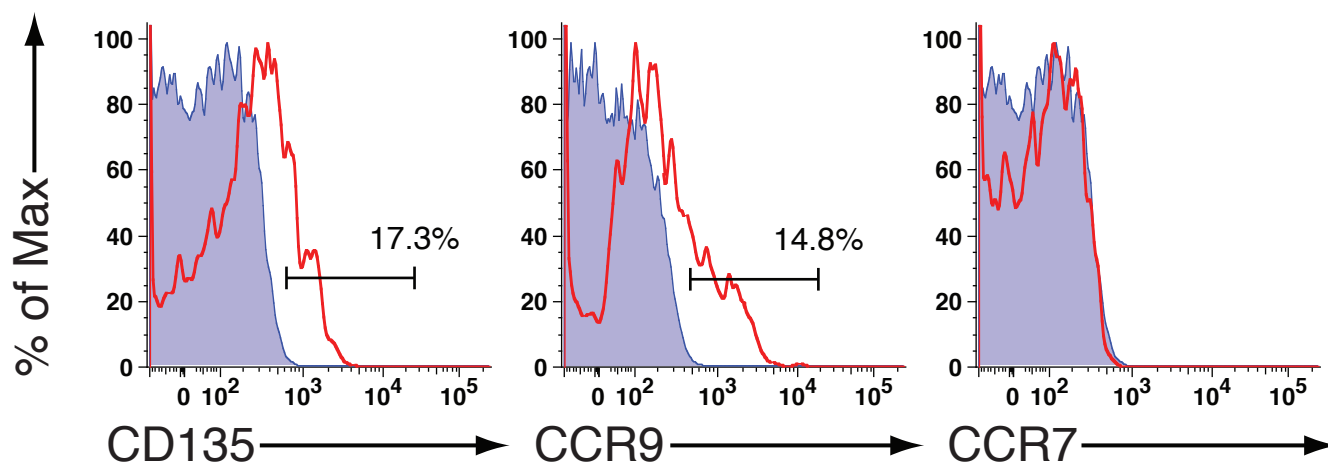

### ETP fetal

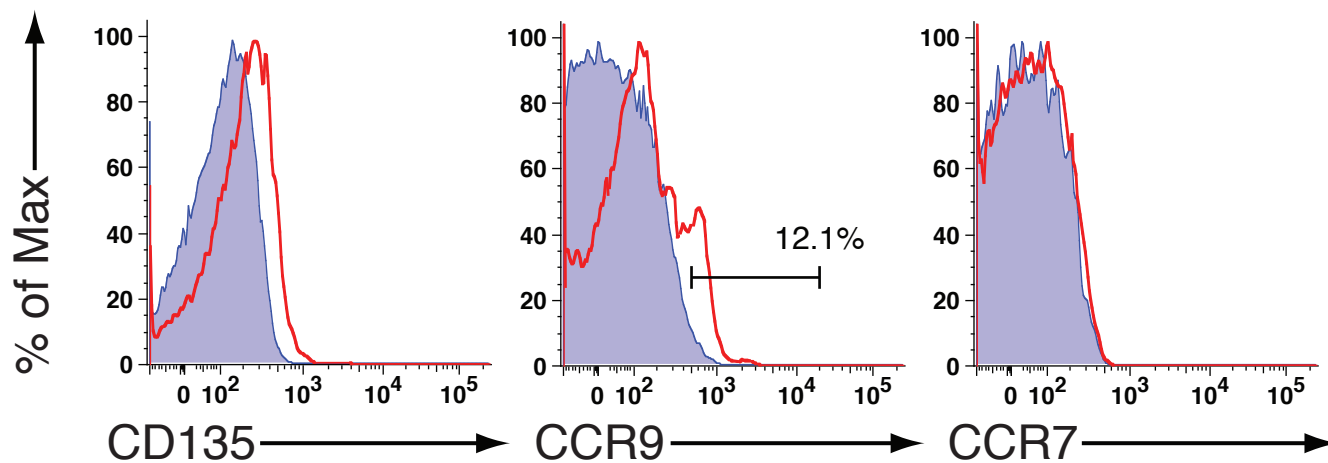

Supplement: 251_2012_620_MOESM4_ESM.pdf [file 251_2012_620_MOESM4_ESM.pdf]
